# Supplementary material for: The temporal dynamics of the gut mycobiome and its association with cardiometabolic health in a nationwide cohort of 12,641 Chinese adults
Source: PubMed Central journal article supplement — Cell Rep Med. 2024 Oct 4;5(10):101775. doi: 10.1016/j.xcrm.2024.101775 (PMC11513856; doi:10.1016/j.xcrm.2024.101775), 2024-10-04
Supplement: mmc1.pdf [file mmc1.pdf]

**Cell Reports Medicine, Volume 5**

**Supplemental information**

**The temporal dynamics of the gut mycobiome  
and its association with cardiometabolic health  
in a nationwide cohort of 12,641 Chinese adults**

**Wanglong Gou, Huijun Wang, Chang Su, Yuanqing Fu, Xinyu Wang, Chang Gao, Menglei Shuai, Zelei Miao, Jiguo Zhang, Xiaofang Jia, Wenwen Du, Ke Zhang, Bing Zhang, and Ju-Sheng Zheng**

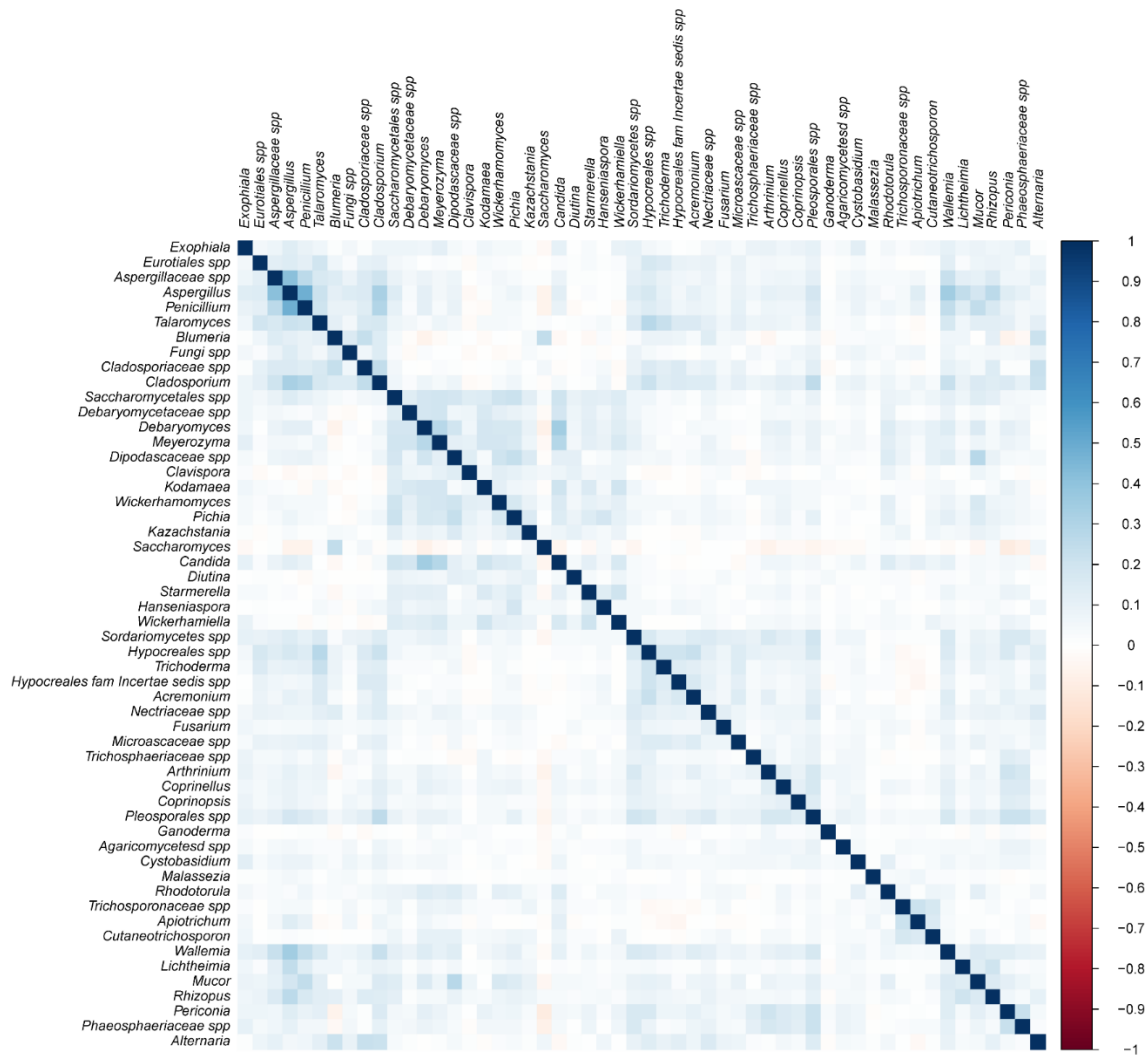

**Figure S1.** The inter-correlation of fungal genera, related to Figure 2. The correlation between each genus was calculated by Spearman correlation.

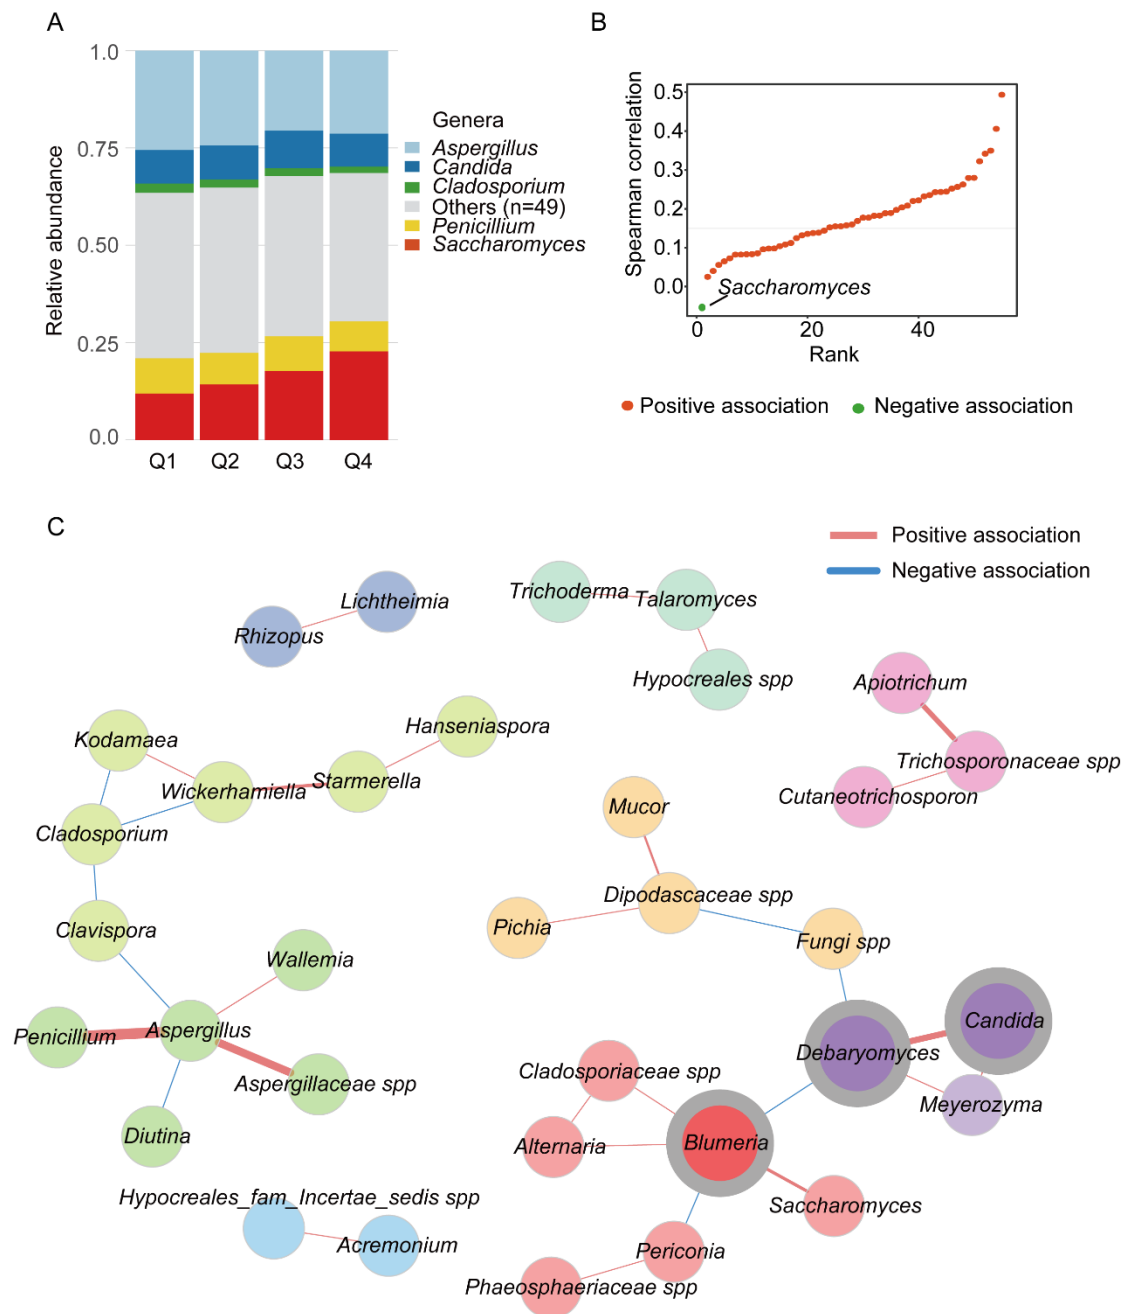

**Figure S2. Distribution of fungal genera across urbanization score and correlation analyses, related to Figure 2.** **A**, Distribution of fungal taxa that present in at least 50% of samples at a minimum relative abundance of 0.1%, across urbanization score. Q1 to Q4 represent the quantiles of the urbanization score. **B**, Correlations between the gut fungal genera and observed OUT. The values on the x-axis and y-axis represent the rank and Spearman's coefficient of each genus's correlation with observed OTUs, respectively. **C**, Co-abundance network construction and keystone taxa identification. Co-abundance network was constructed by SparCC analysis. Correlations with FDR adjusted P values < 0.05 and with a magnitude above 0.2 were selected for further visualization and network analysis. Here, we used eigenvector centrality to define the central node in the co-abundance network (node with a centrality value above the empirical 95% quantile in the network). The size of each node was proportional to its eigenvector centrality value. Nodes were clustered and marked with different colors to visually distinguish between clusters.

A

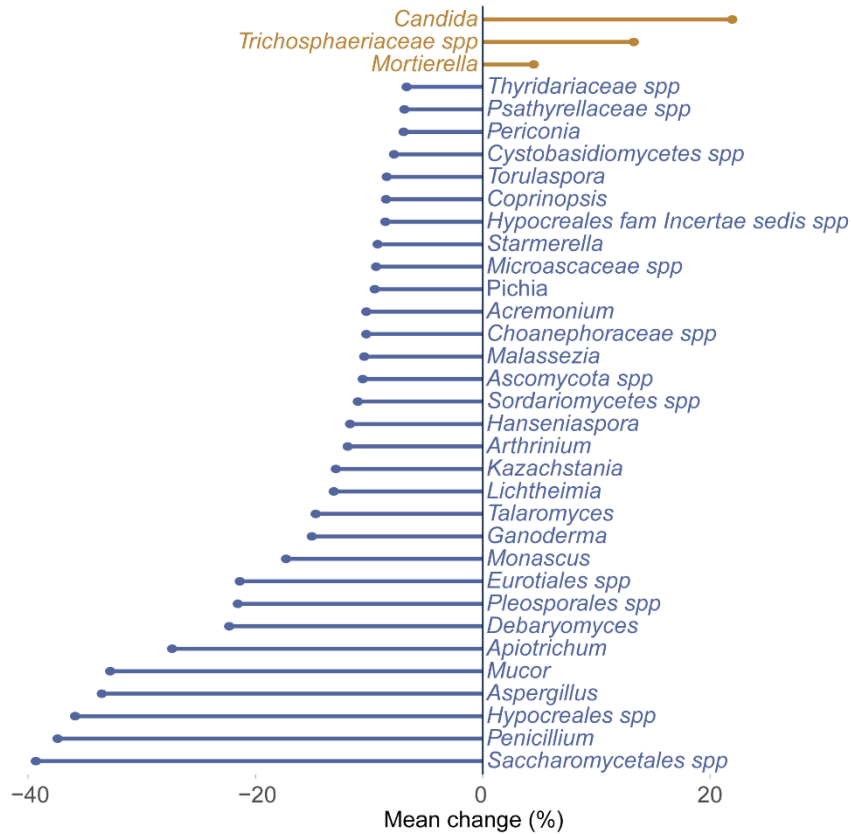

B

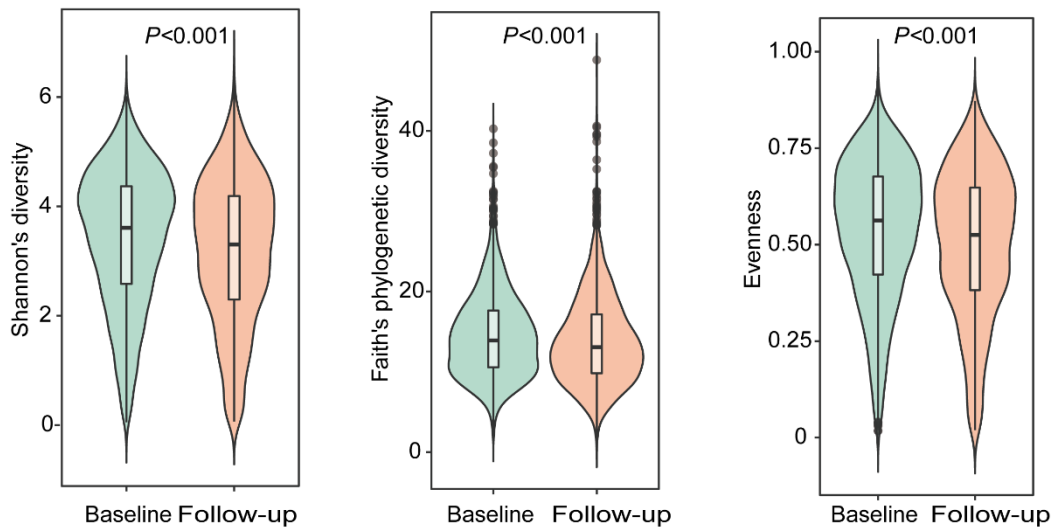

**Figure S3. Temporal variability of gut mycobiome over time, related to Figure 4. A,** Percentage changes of fungal genera with significant increase (brown-orange) or decrease (blue) in abundance over three years. Temporal changes in the relative abundance of the gut mycobiome were evaluated using a paired two-sided Wilcoxon signed-rank test. Only statistically significant results (FDR < 0.05) are depicted in the figure. **B,** Comparison of the fungal alpha diversity indices between baseline and follow-up.

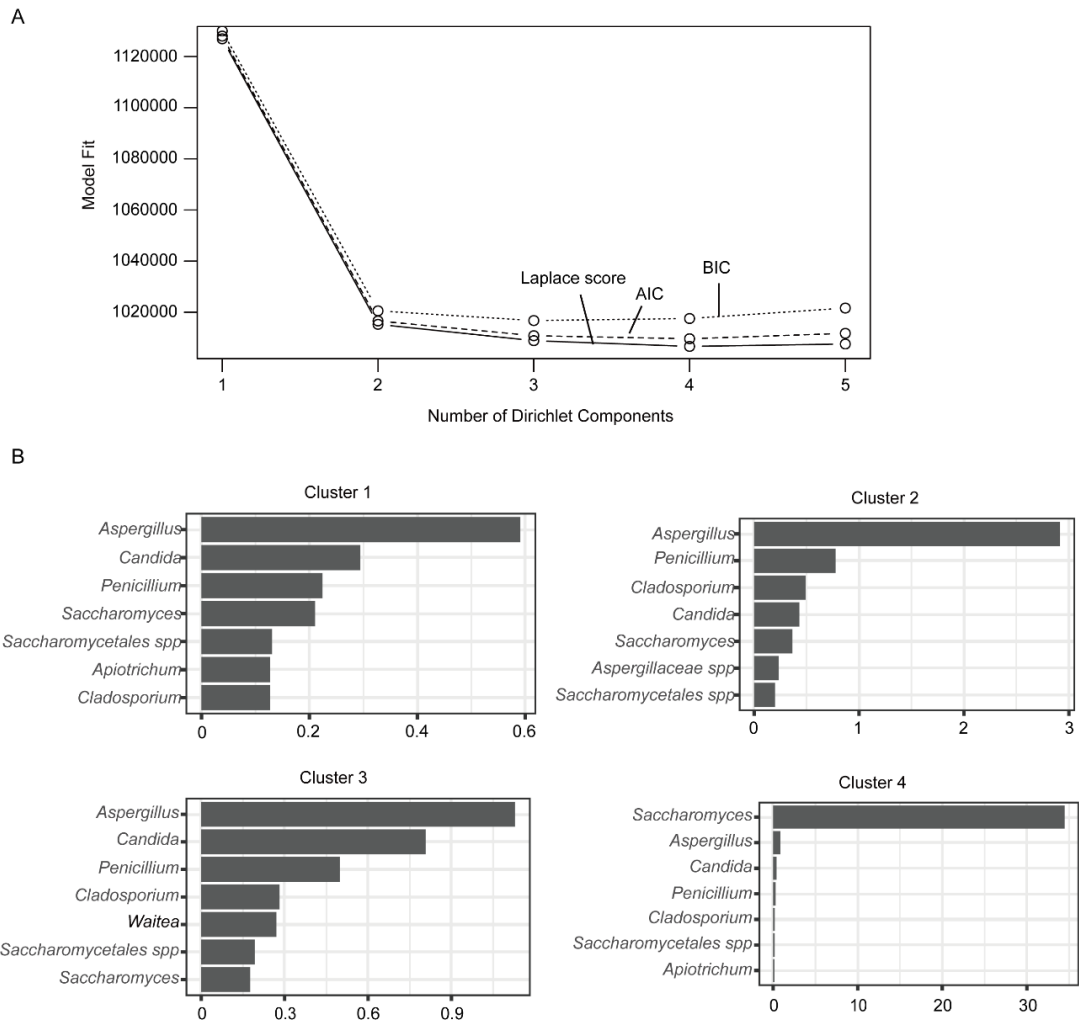

**Figure S4. DMM clustering of ITS gene sequencing data, related to Figure 4. A,** Model fitting performance for different numbers of clusters. The x-axis represents the number of clusters, while the y-axis showcases the corresponding values of the performance indices. AIC, Akaike Information Criterion; BIC, Bayesian Information Criterion. **B,** Box plot showing the importance for dominant fungal taxa per DMM cluster.

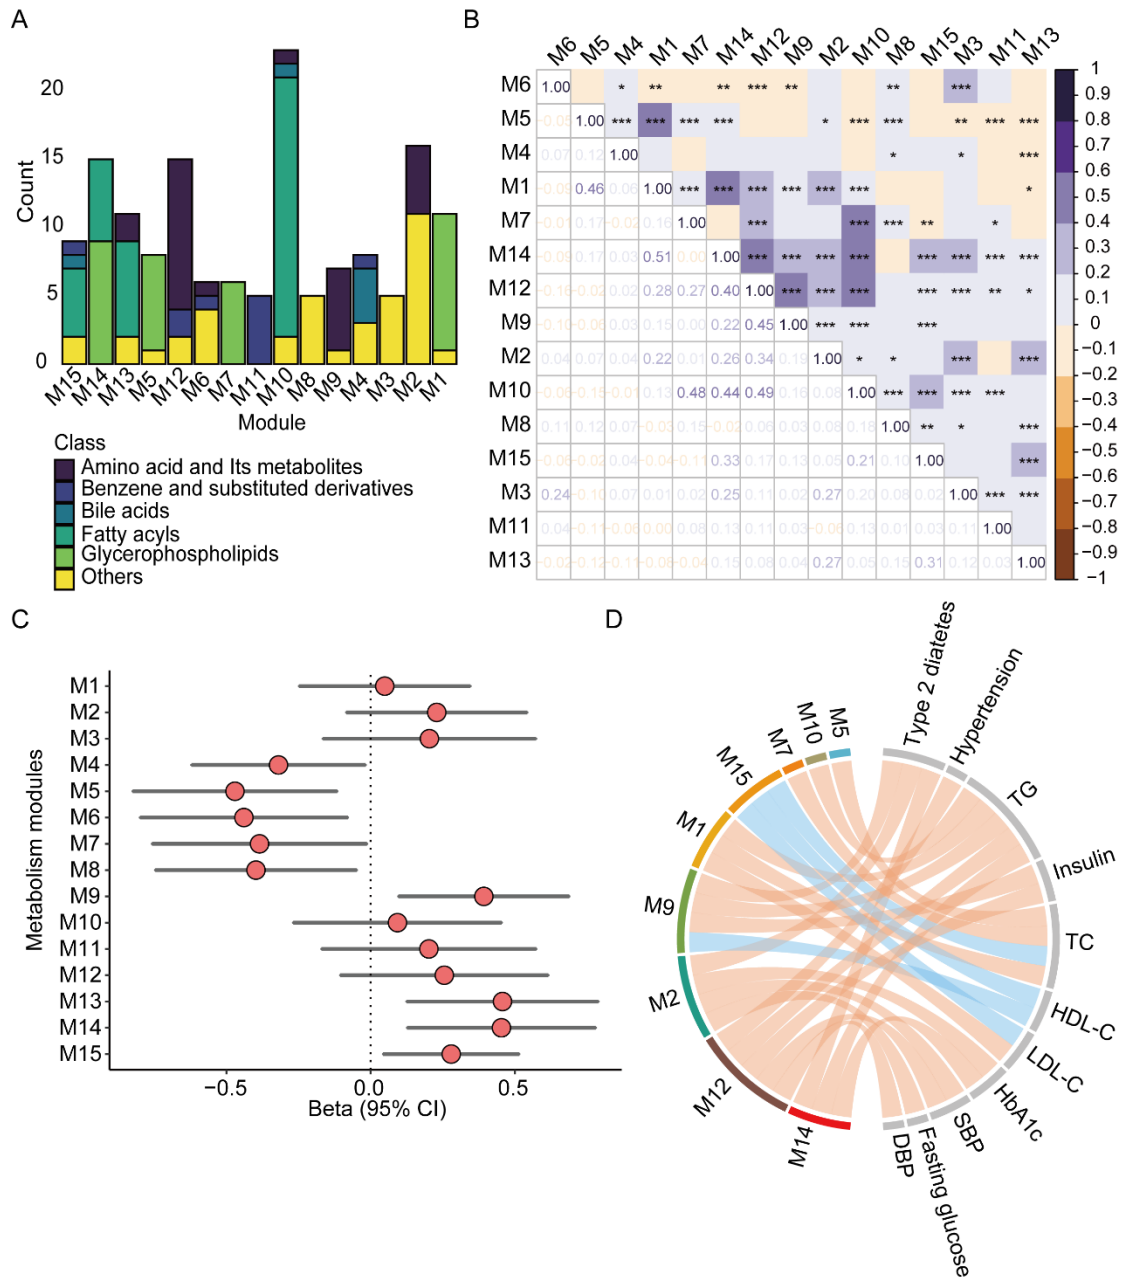

**Figure S5. Dynamic interplay between gut microbiome, metabolism modules and cardiometabolic health, related to Figure 5.** **A**, The distribution of metabolites across different metabolism modules. **B**, Paired association of metabolism modules. The correlation between each metabolism module was calculated by Spearman correlation coefficient. Significance levels are indicated as follows: \*,  $P < 0.05$ ; \*\*,  $P < 0.01$ ; \*\*\*,  $P < 0.001$ . **C**, Association of gut microbiome with metabolism modules. The analysis was conducted using linear mixed-effects regression model, with adjustment for the age, gender and BMI. The linear mixed-effects model included a random intercept and random coefficient for provinces or megacities, accounting for the variability in gut fungal composition across different regions. The figure presents Z-scored beta coefficients along with their corresponding 95% confidence intervals. **D**, Association of metabolism modules with cardiometabolic diseases, as well as host metabolism indicators. Weighted Gene Co-expression Network Analysis was employed to identify metabolism modules of differential metabolites. Only significant associations (orange for positive, blue for negative) were showed on the chord diagram.

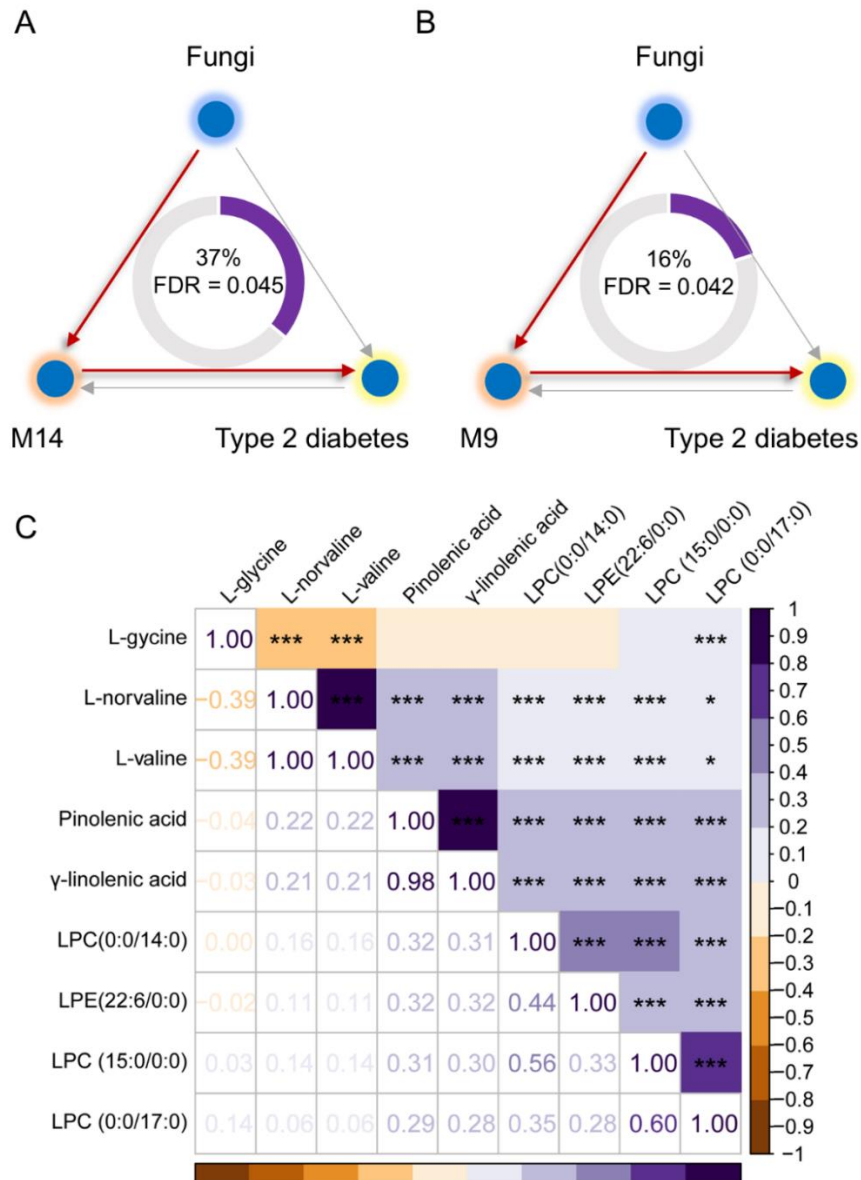

**Figure S6. Metabolism modules mediate the effect of gut mycobiome on type 2 diabetes, related to Figure 6.** **A**, Mediation linkages among the gut mycobiome, metabolism modules (M14 and M9) and type 2 diabetes. The proportion of mediation effect is displayed at the center of the ring chart. **B**, As in A, but for M9 module. **C**, Paired associations of metabolites belong to M14 and M9. The correlation between each metabolite was calculated by Spearman correlation coefficient. Significance levels are indicated as follows: \*,  $P < 0.05$ ; \*\*,  $P < 0.01$ ; \*\*\*,  $P < 0.001$ .

**Table S1. Characteristics of the participants included in the study, related to Figure 1.**

| Factor                               | CHNS-1              | CHNS-2 (baseline)  | CHNS-2 (follow-up) |
|--------------------------------------|---------------------|--------------------|--------------------|
| Number of participants               | 10695               | 1946               | 1946               |
| Age, years                           | 51.30 (15.48)       | 56.51 (13.73)      | 59.54 (13.73)      |
| Women, n (%)                         | 5727 (53.6%)        | 1064 (54.7%)       | 1064 (54.7%)       |
| Urban, n (%)                         | 4281 (40.0%)        | 584 (30.0%)        | 584 (30.0%)        |
| Urbanization score                   | 71.95 (17.64)       | 75.05 (16.68)      | 75.05 (16.68)      |
| Pet ownership, n (%)                 | 1973 (19.0%)        | 496 (26.0%)        | 515 (26.7%)        |
| Education, n (%)                     |                     |                    |                    |
| Middle school or lower               | 6822 (63.8%)        | 1459 (75.0%)       | 1459 (75.0%)       |
| High school or professional college  | 2296 (21.5%)        | 353 (18.1%)        | 353 (18.1%)        |
| University                           | 1577 (14.7%)        | 134 (6.9%)         | 134 (6.9%)         |
| Married, n (%)                       | 10216 (95.5%)       | 1908 (98.0%)       | 1908 (98.0%)       |
| Income, yuan / year per household    | 68145.23 (92725.05) | 77164.02 (2.3e+05) | 83565.78 (1.4e+05) |
| BMI, kg/m <sup>2</sup>               | 24.15 (4.10)        | 24.19 (4.23)       | 24.24 (3.85)       |
| Waist circumference, cm              | 83.79 (12.72)       | 84.59 (12.05)      | 84.69 (11.12)      |
| Hip circumference, cm                | 94.68 (10.34)       | 94.89 (9.56)       | 94.60 (9.17)       |
| SBP, mmHg                            | 126.91 (19.04)      | 131.16 (18.80)     | 133.75 (20.12)     |
| DBP, mmHg                            | 80.62 (11.17)       | 82.51 (10.57)      | 83.47 (11.59)      |
| HbA1c, %                             | 5.72 (0.97)         | 5.73 (0.92)        | 5.69 (0.97)        |
| Fasting glucose, mmol/l              | 5.49 (1.53)         | 5.44 (1.40)        | 5.87 (1.62)        |
| Insulin, mmol/l                      | 7.62 (7.87)         | 7.07 (7.48)        | 10.44 (19.35)      |
| HDL-C, mmol/l                        | 1.28 (0.33)         | 1.25 (0.34)        | 1.46 (0.43)        |
| LDL-C, mmol/l                        | 3.12 (0.90)         | 3.12 (0.94)        | 3.15 (0.92)        |
| TC, mmol/l                           | 4.91 (1.10)         | 5.02 (1.04)        | 5.01 (0.99)        |
| TG, mmol/l                           | 1.50 (1.12)         | 1.53 (1.29)        | 1.73 (1.62)        |
| Type 2 diabetes, n (%)               | 1183 (11.1%)        | 235 (12.1%)        | 285 (14.6%)        |
| Prediabetes, n (%)                   | 2900 (31.1%)        | 624 (32.1%)        | 514 (26.4%)        |
| Hypertension, n (%)                  | 2973 (28.0%)        | 721 (37.1%)        | 815 (41.9%)        |
| Dyslipidemia, n (%)                  | 3465 (32.4%)        | 698 (40.0%)        | 640 (34.7%)        |
| Intestinal disease, n (%)            | 245 (2.4%)          | 25 (1.3%)          | 48 (2.5%)          |
| Diarrhea, n (%)                      | 101 (1.0%)          | 23 (1.2%)          | 18 (0.9%)          |
| Myocardial infarction, n (%)         | 87 (0.8%)           | 16 (0.8%)          | 19 (1.0%)          |
| Stroke, n (%)                        | 135 (1.3%)          | 32 (1.6%)          | 53 (2.7%)          |
| Cancer, n (%)                        | 115 (1.1%)          | 19 (1.0%)          | 26 (1.3%)          |
| Hypertension medications, n (%)      | 1446 (13.5%)        | 332 (17.1%)        | 414 (21.3%)        |
| Diabetes medications, n (%)          | 437 (4.10%)         | 80 (4.1%)          | 104 (5.3%)         |
| Antibiotic (current), n (%)          | 205 (2.0%)          | 29 (1.5%)          | 42 (2.2%)          |
| Antibiotic (within 6 months), n (%)  | 1000 (9.7%)         | 153 (8.0%)         | 188 (9.8%)         |
| Probiotics, n (%)                    | 335 (3.2%)          | 43 (2.3%)          | 86 (4.5%)          |
| Anti-inflammatory medications, n (%) | 259 (2.5%)          | 30 (1.6%)          | 51 (2.6%)          |
| Antiacid medications, n (%)          | 104 (1.0%)          | 18 (0.9%)          | 22 (1.1%)          |
| Proton pump inhibitor, n (%)         | 154 (1.5%)          | 27 (1.4%)          | 33 (1.7%)          |
| Current smoking, n (%)               | 2785 (26.3%)        | 490 (25.4%)        | 462 (23.8%)        |
| Current alcohol consumption, n (%)   | 2905 (27.5%)        | 539 (27.9%)        | 503 (26.0%)        |
| Physical activity, MET               | 143.48 (164.77)     | 173.93 (175.42)    | 171.24 (193.38)    |
| Wheat intake, g/day                  | 137.27 (136.18)     | 92.00 (109.05)     | 100.89 (108.53)    |
| Rice intake, g/day                   | 220.75 (172.69)     | 241.95 (132.27)    | 233.65 (142.74)    |
| Dark vegetable intake, g/day         | 65.28 (75.69)       | 79.02 (93.01)      | 61.01 (81.76)      |
| Light vegetable intake, g/day        | 200.56 (132.86)     | 214.45 (133.23)    | 214.30 (136.44)    |
| Vegetable intake, g/day              | 265.83 (153.97)     | 293.47 (150.02)    | 275.31 (153.13)    |
| Salted vegetable intake, g/day       | 3.58 (12.58)        | 5.34 (14.39)       | 5.13 (18.65)       |
| Fruit intake, g/day                  | 41.77 (73.87)       | 52.31 (81.80)      | 52.82 (90.17)      |
| Nuts intake, g/day                   | 4.47 (14.53)        | 4.68 (14.23)       | 4.76 (14.98)       |
| Pork intake, g/day                   | 68.54 (70.36)       | 65.58 (65.53)      | 63.87 (66.97)      |
| Poultry intake, g/day                | 16.02 (36.24)       | 19.12 (39.95)      | 17.93 (37.95)      |
| Milk intake, g/day                   | 27.48 (75.69)       | 20.45 (61.36)      | 20.73 (62.03)      |
| Egg intake, g/day                    | 27.01 (31.03)       | 29.70 (33.36)      | 28.76 (35.16)      |
| Fish intake, g/day                   | 26.45 (46.70)       | 35.89 (54.12)      | 35.66 (54.20)      |
| Carrot intake, g/day                 | 27.52 (61.04)       | 28.28 (53.46)      | 32.48 (67.69)      |
| Tuber intake, g/day                  | 36.40 (54.73)       | 33.60 (59.24)      | 34.02 (66.63)      |
| Pastes intake, g/day                 | 1.74 (10.77)        | 1.15 (4.76)        | 1.16 (6.21)        |
| Other meat intake, g/day             | 10.18 (27.12)       | 7.73 (23.57)       | 8.83 (26.44)       |
| Cake intake, g/day                   | 14.43 (38.36)       | 10.82 (29.48)      | 15.24 (39.97)      |
| Sugar intake, g/day                  | 2.26 (9.00)         | 2.35 (5.91)        | 1.93 (6.77)        |
| Vegetable oils intake, g/day         | 35.94 (34.95)       | 39.14 (34.79)      | 35.55 (27.08)      |
| Animal oil intake, g/day             | 3.47 (13.03)        | 0.45 (3.45)        | 1.03 (7.22)        |
| Salt intake, g/day                   | 8.53 (11.19)        | 9.99 (30.19)       | 7.70 (5.67)        |
| Sauce intake, g/day                  | 9.44 (27.57)        | 9.71 (13.70)       | 10.08 (13.04)      |
| Other foods intake, g/day            | 18.77 (30.00)       | 16.19 (28.53)      | 14.09 (26.77)      |



**Table S2. The prevalence and relative abundance of included genera in the CHNS-1 cohort, related to Figure 2.**

| Phylum     | Class           | Order             | Family                               | Genus           | Relative abundance (%) | Prevalence (%) |
|------------|-----------------|-------------------|--------------------------------------|-----------------|------------------------|----------------|
| Ascomycota | Eurotiomycetes  | Eurotiales        | Aspergillaceae                       | Aspergillus     | 22.60                  | 99.21          |
| Ascomycota | Saccharomycetes | Saccharomycetales | Saccharomycetaceae                   | Saccharomyces   | 16.12                  | 82.56          |
| Ascomycota | Saccharomycetes | Saccharomycetales | Saccharomycetales_fam_Incertae_sedis | Candida         | 8.80                   | 89.76          |
| Ascomycota | Eurotiomycetes  | Eurotiales        | Aspergillaceae                       | Penicillium     | 8.35                   | 91.93          |
| Ascomycota | Saccharomycetes | Saccharomycetales | Debaryomycetaceae                    | Debaryomyces    | 3.31                   | 67.18          |
| Ascomycota | Saccharomycetes | Saccharomycetales | Unassigned                           | Unassigned      | 3.04                   | 64.82          |
| Ascomycota | Saccharomycetes | Saccharomycetales | Dipodascaceae                        | Unassigned      | 2.88                   | 57.28          |
| Ascomycota | Dothideomycetes | Capnodiales       | Cladosporiaceae                      | Cladosporium    | 2.00                   | 71.86          |
| Ascomycota | Leotiomycetes   | Erysiphales       | Erysiphaceae                         | Blumeria        | 1.20                   | 46.11          |
| Ascomycota | Eurotiomycetes  | Eurotiales        | Aspergillaceae                       | Unassigned      | 1.03                   | 50.30          |
| Ascomycota | Dothideomycetes | Pleosporales      | Unassigned                           | Unassigned      | 0.99                   | 48.21          |
| Ascomycota | Saccharomycetes | Saccharomycetales | Pichiaceae                           | Pichia          | 0.88                   | 26.42          |
| Ascomycota | Saccharomycetes | Saccharomycetales | Saccharomycetaceae                   | Kazachstania    | 0.82                   | 26.63          |
| Ascomycota | Sordariomycetes | Hypocreales       | Unassigned                           | Unassigned      | 0.71                   | 35.41          |
| Ascomycota | Dothideomycetes | Pleosporales      | Periconiaceae                        | Periconia       | 0.54                   | 24.09          |
| Ascomycota | Saccharomycetes | Saccharomycetales | Debaryomycetaceae                    | Meyerozyma      | 0.48                   | 26.45          |
| Ascomycota | Saccharomycetes | Saccharomycetales | Saccharomycetales_fam_Incertae_sedis | Starmerella     | 0.47                   | 19.41          |
| Ascomycota | Saccharomycetes | Saccharomycetales | Saccharomycodaceae                   | Hanseniaspora   | 0.45                   | 15.95          |
| Ascomycota | Eurotiomycetes  | Eurotiales        | Trichocomaceae                       | Talaromyces     | 0.39                   | 28.85          |
| Ascomycota | Eurotiomycetes  | Eurotiales        | Unassigned                           | Unassigned      | 0.38                   | 22.69          |
| Ascomycota | Saccharomycetes | Saccharomycetales | Phaffomycetaceae                     | Wickerhamomyces | 0.34                   | 22.48          |
| Ascomycota | Saccharomycetes | Saccharomycetales | Metschnikowiaceae                    | Clavispora      | 0.33                   | 12.36          |
| Ascomycota | Eurotiomycetes  | Chaetothyriales   | Herpotrichiellaceae                  | Exophiala       | 0.29                   | 21.43          |
| Ascomycota | Dothideomycetes | Pleosporales      | Pleosporaceae                        | Alternaria      | 0.27                   | 22.64          |
| Ascomycota | Sordariomycetes | Unassigned        | Unassigned                           | Unassigned      | 0.26                   | 23.22          |
| Ascomycota | Saccharomycetes | Saccharomycetales | Trichomonascaceae                    | Wickerhamiella  | 0.26                   | 13.28          |
| Ascomycota | Sordariomycetes | Trichosphaeriales | Trichosphaeriaceae                   | Unassigned      | 0.25                   | 15.08          |
| Ascomycota | Saccharomycetes | Saccharomycetales | Saccharomycetales_fam_Incertae_sedis | Diutina         | 0.25                   | 10.08          |
| Ascomycota | Sordariomycetes | Hypocreales       | Nectriaceae                          | Unassigned      | 0.24                   | 20.34          |
| Ascomycota | Sordariomycetes | Hypocreales       | Hypocreaceae                         | Trichoderma     | 0.21                   | 14.58          |
| Ascomycota | Dothideomycetes | Capnodiales       | Cladosporiaceae                      | Unassigned      | 0.21                   | 20.15          |
| Ascomycota | Saccharomycetes | Saccharomycetales | Metschnikowiaceae                    | Kodamaea        | 0.18                   | 11.88          |

|               |                     |                   |                                |                     |      |       |
|---------------|---------------------|-------------------|--------------------------------|---------------------|------|-------|
| Ascomycota    | Saccharomycetes     | Saccharomycetales | Debaryomycetaceae              | Unassigned          | 0.17 | 12.63 |
| Ascomycota    | Sordariomycetes     | Hypocreales       | Hypocreales_fam_Incertae_sedis | Acremonium          | 0.14 | 10.04 |
| Ascomycota    | Sordariomycetes     | Microascales      | Microascaceae                  | Unassigned          | 0.13 | 11.01 |
| Ascomycota    | Sordariomycetes     | Xylariales        | Apiosporaceae                  | Arthrinium          | 0.13 | 12.03 |
| Ascomycota    | Dothideomycetes     | Pleosporales      | Phaeosphaeriaceae              | Unassigned          | 0.12 | 11.82 |
| Ascomycota    | Sordariomycetes     | Hypocreales       | Hypocreales_fam_Incertae_sedis | Unassigned          | 0.11 | 10.29 |
| Ascomycota    | Sordariomycetes     | Hypocreales       | Nectriaceae                    | Fusarium            | 0.11 | 12.59 |
| Basidiomycota | Tremellomycetes     | Trichosporonales  | Trichosporonaceae              | Apiotrichum         | 1.97 | 62.46 |
| Basidiomycota | Microbotryomycetes  | Sporidiobolales   | Sporidiobolaceae               | Rhodotorula         | 0.85 | 39.34 |
| Basidiomycota | Agaricomycetes      | Unassigned        | Unassigned                     | Unassigned          | 0.76 | 20.95 |
| Basidiomycota | Wallemiomycetes     | Wallemiales       | Wallemiaceae                   | Wallemia            | 0.76 | 43.52 |
| Basidiomycota | Agaricomycetes      | Polyporales       | Ganodermataceae                | Ganoderma           | 0.43 | 12.12 |
| Basidiomycota | Tremellomycetes     | Trichosporonales  | Trichosporonaceae              | Cutaneotrichosporon | 0.38 | 19.06 |
| Basidiomycota | Tremellomycetes     | Trichosporonales  | Trichosporonaceae              | Unassigned          | 0.35 | 23.00 |
| Basidiomycota | Cystobasidiomycetes | Cystobasidiales   | Cystobasidiaceae               | Cystobasidium       | 0.28 | 23.38 |
| Basidiomycota | Agaricomycetes      | Agaricales        | Psathyrellaceae                | Coprinopsis         | 0.20 | 16.14 |
| Basidiomycota | Malasseziomycetes   | Malasseziales     | Malasseziaceae                 | Malassezia          | 0.12 | 11.81 |
| Basidiomycota | Agaricomycetes      | Agaricales        | Psathyrellaceae                | Coprinellus         | 0.09 | 10.83 |
| Mucoromycota  | Mucoromycetes       | Mucorales         | Mucoraceae                     | Mucor               | 3.49 | 61.93 |
| Mucoromycota  | Mucoromycetes       | Mucorales         | Rhizopodaceae                  | Rhizopus            | 0.83 | 41.25 |
| Mucoromycota  | Mucoromycetes       | Mucorales         | Lichtheimiaceae                | Lichtheimia         | 0.11 | 15.63 |
| Unassigned    | Unassigned          | Unassigned        | Unassigned                     | Unassigned          | 9.95 | 89.71 |

**Table S3. Normalized eigenvector centrality and degree of genera in the network for the CHNS-1 cohort, related to Figure 2.**

| Genus                              | Normalized eigenvector centrality | Degree |
|------------------------------------|-----------------------------------|--------|
| Blumeria                           | 1                                 | 5      |
| Debaryomyces                       | 0.92                              | 4      |
| Candida                            | 0.57                              | 2      |
| Cladosporiaceae spp                | 0.56                              | 2      |
| Alternaria                         | 0.55                              | 2      |
| Meyerozyma                         | 0.55                              | 2      |
| Fungi spp                          | 0.44                              | 2      |
| Periconia                          | 0.40                              | 2      |
| Saccharomyces                      | 0.38                              | 1      |
| Dipodascaceae spp                  | 0.21                              | 3      |
| Phaeosphaeriaceae spp              | 0.14                              | 1      |
| Mucor                              | 0.079                             | 1      |
| Pichia                             | 0.074                             | 1      |
| Lichtheimia                        | 0                                 | 1      |
| Aspergillus                        | 0                                 | 5      |
| Wickerhamiella                     | 0                                 | 3      |
| Cladosporium                       | 0                                 | 3      |
| Talaromyces                        | 0                                 | 2      |
| Trichosporonaceae spp              | 0                                 | 2      |
| Clavispora                         | 0                                 | 2      |
| Kodamaea                           | 0                                 | 2      |
| Starmerella                        | 0                                 | 2      |
| Acremonium                         | 0                                 | 1      |
| Apiotrichum                        | 0                                 | 1      |
| Aspergillaceae spp                 | 0                                 | 1      |
| Cutaneotrichosporon                | 0                                 | 1      |
| Diutina                            | 0                                 | 1      |
| Hanseniaspora                      | 0                                 | 1      |
| Hypocreales spp                    | 0                                 | 1      |
| Penicillium                        | 0                                 | 1      |
| Rhizopus                           | 0                                 | 1      |
| Trichoderma                        | 0                                 | 1      |
| Wallemia                           | 0                                 | 1      |
| Hypocreales_fam_Incertae_sedis spp | 0                                 | 1      |
| Agaricomycetes spp                 | 0                                 | 0      |
| Arthrinium                         | 0                                 | 0      |
| Coprinellus                        | 0                                 | 0      |
| Coprinopsis                        | 0                                 | 0      |
| Cystobasidium                      | 0                                 | 0      |
| Debaryomycetaceae spp              | 0                                 | 0      |
| Eurotiales spp                     | 0                                 | 0      |
| Exophiala                          | 0                                 | 0      |
| Fusarium                           | 0                                 | 0      |
| Ganoderma                          | 0                                 | 0      |

|                        |   |   |
|------------------------|---|---|
| Kazachstania           | 0 | 0 |
| Malassezia             | 0 | 0 |
| Microascaceae spp      | 0 | 0 |
| Nectriaceae spp        | 0 | 0 |
| Pleosporales spp       | 0 | 0 |
| Rhodotorula            | 0 | 0 |
| Saccharomycetales spp  | 0 | 0 |
| Sordariomycetes spp    | 0 | 0 |
| Trichosphaeriaceae spp | 0 | 0 |
| Wickerhamomyces        | 0 | 0 |

---

**Table S4. Association of fungal alpha diversity with cardiometabolic diseases, adjusted for sequencing depth, related to Figure 3.**

| Fungal alpha diversity | Cardiometabolic diseases | Adjusted odds ratio | Lower confidence interval | Higher confidence interval | P        |
|------------------------|--------------------------|---------------------|---------------------------|----------------------------|----------|
| Faith_pd               | Dyslipidemia             | 0.90                | 0.86                      | 0.94                       | 0.000017 |
| Observed OTUs          | Type 2 diabetes          | 0.89                | 0.83                      | 0.96                       | 0.002    |
| Observed OTUs          | Dyslipidemia             | 0.93                | 0.89                      | 0.98                       | 0.003    |
| Shannon                | Type 2 diabetes          | 0.92                | 0.86                      | 0.98                       | 0.010    |
| Observed OTUs          | Hypertension             | 0.94                | 0.90                      | 0.99                       | 0.020    |
| Faith_pd               | Type 2 diabetes          | 0.92                | 0.86                      | 0.99                       | 0.029    |
| Evenness               | Type 2 diabetes          | 0.94                | 0.88                      | 1.00                       | 0.043    |
| Shannon                | Dyslipidemia             | 0.97                | 0.93                      | 1.01                       | 0.187    |
| Shannon                | Hypertension             | 0.97                | 0.93                      | 1.02                       | 0.269    |
| Evenness               | Dyslipidemia             | 0.99                | 0.94                      | 1.03                       | 0.493    |
| Evenness               | Hypertension             | 0.99                | 0.94                      | 1.04                       | 0.668    |
| Faith_pd               | Hypertension             | 0.99                | 0.94                      | 1.04                       | 0.711    |

**Table S5. Characteristics of the participants at baseline, stratified by fungal clusters, related to Figure 4.**

| Factor                              | C1                 | C2                 | C3                 | C4                 |
|-------------------------------------|--------------------|--------------------|--------------------|--------------------|
| Number of participants              | 1084               | 525                | 174                | 163                |
| Age, years                          | 55.96 (13.79)      | 58.15 (12.77)      | 56.63 (15.25)      | 54.80 (14.29)      |
| Women, n (%)                        | 582 (53.7%)        | 298 (56.8%)        | 93 (53.4%)         | 91 (55.8%)         |
| Urban, n (%)                        | 398 (36.7%)        | 86 (16.4%)         | 33 (19.0%)         | 67 (41.1%)         |
| Urbanization score                  | 76.29 (17.33)      | 69.01 (17.47)      | 65.85 (15.31)      | 78.28 (16.50)      |
| Education, n (%)                    |                    |                    |                    |                    |
| Middle school or lower              | 767 (70.8%)        | 425 (81.0%)        | 149 (85.6%)        | 100 (61.3%)        |
| High school or professional college | 224 (20.7%)        | 71 (13.5%)         | 20 (11.5%)         | 45 (27.6%)         |
| University                          | 93 (8.6%)          | 29 (5.5%)          | 5 (2.9%)           | 18 (11.0%)         |
| Married, n (%)                      | 1063 (98.1%)       | 517 (98.5%)        | 172 (98.9%)        | 159 (97.5%)        |
| Income, yuan / year per household   | 84922.58 (1.3e+05) | 82833.71 (1.6e+05) | 67058.78 (1.2e+05) | 94251.86 (1.0e+05) |
| BMI, kg/m <sup>2</sup>              | 24.28 (3.72)       | 24.34 (3.66)       | 22.85 (7.65)       | 24.58 (3.83)       |
| Waist circumference, cm             | 84.90 (12.09)      | 85.47 (10.75)      | 78.89 (13.29)      | 85.78 (12.81)      |
| Hip circumference, cm               | 95.31 (9.76)       | 95.62 (7.97)       | 88.96 (11.60)      | 96.08 (8.38)       |
| SBP, mmHg                           | 131.32 (18.08)     | 131.70 (19.65)     | 129.59 (20.26)     | 130.03 (19.14)     |
| DBP, mmHg                           | 82.40 (10.15)      | 83.24 (11.04)      | 80.50 (10.46)      | 83.06 (11.62)      |
| HbA1c, %                            | 5.74 (0.96)        | 5.73 (0.83)        | 5.57 (0.93)        | 5.78 (0.87)        |
| Fasting glucose, mmol/l             | 5.44 (1.43)        | 5.39 (1.36)        | 5.63 (1.23)        | 5.49 (1.45)        |
| Insulin, mmol/l                     | 7.22 (7.75)        | 6.58 (7.03)        | 6.36 (4.68)        | 8.35 (9.09)        |
| HDL-C, mmol/l                       | 1.25 (0.34)        | 1.24 (0.34)        | 1.37 (0.37)        | 1.21 (0.31)        |
| LDL-C, mmol/l                       | 3.15 (0.93)        | 3.00 (0.87)        | 3.36 (0.92)        | 3.13 (1.20)        |
| TC, mmol/l                          | 5.03 (1.02)        | 4.92 (0.98)        | 5.29 (1.06)        | 5.04 (1.32)        |
| TG, mmol/l                          | 1.54 (1.10)        | 1.53 (1.34)        | 1.30 (0.90)        | 1.69 (2.21)        |
| Type 2 diabetes, n (%)              | 136 (12.6%)        | 61 (11.6%)         | 10 (5.8%)          | 28 (17.2%)         |
| Hypertension, n (%)                 | 394 (36.5%)        | 203 (38.7%)        | 61 (35.1%)         | 63 (38.7%)         |
| Dyslipidemia, n (%)                 | 388 (40.3%)        | 190 (39.0%)        | 55 (38.2%)         | 65 (42.5%)         |
| Current smoking, n (%)              | 279 (26.1%)        | 129 (24.7%)        | 39 (22.4%)         | 43 (26.5%)         |
| Current alcohol consumption, n (%)  | 317 (29.6%)        | 128 (24.5%)        | 52 (29.9%)         | 42 (25.9%)         |
| Physical activity, MET              | 158.65 (162.54)    | 209.92 (201.01)    | 181.86 (172.98)    | 149.75 (152.88)    |
| Wheat intake, g/day                 | 87.39 (102.33)     | 118.22 (124.52)    | 36.87 (64.77)      | 96.27 (110.14)     |
| Rice intake, g/day                  | 237.89 (126.15)    | 228.43 (124.33)    | 322.50 (171.69)    | 226.44 (115.96)    |
| Dark vegetable intake, g/day        | 76.67 (86.58)      | 64.78 (82.91)      | 147.41 (140.84)    | 68.05 (67.90)      |
| Light vegetable intake, g/day       | 215.59 (132.90)    | 219.21 (133.08)    | 183.38 (130.83)    | 223.84 (132.24)    |
| Vegetable intake, g/day             | 292.35 (149.76)    | 283.99 (149.98)    | 330.79 (151.52)    | 291.89 (145.70)    |
| Salted vegetable intake, g/day      | 5.23 (13.55)       | 4.49 (12.97)       | 7.71 (16.79)       | 5.65 (12.35)       |
| Fruit intake, g/day                 | 57.04 (86.59)      | 48.07 (76.01)      | 30.65 (53.86)      | 56.43 (80.83)      |
| Nuts intake, g/day                  | 5.27 (14.88)       | 4.18 (11.91)       | 2.89 (10.90)       | 3.69 (11.88)       |
| Pork intake, g/day                  | 68.02 (65.82)      | 54.30 (62.77)      | 89.06 (70.08)      | 60.75 (58.90)      |
| Poultry intake, g/day               | 18.53 (38.16)      | 14.90 (33.84)      | 32.84 (48.51)      | 20.50 (39.56)      |
| Milk intake, g/day                  | 24.83 (66.79)      | 10.39 (39.92)      | 5.36 (34.58)       | 39.33 (86.33)      |
| Egg intake, g/day                   | 31.04 (32.64)      | 30.83 (37.49)      | 17.92 (26.49)      | 29.64 (27.21)      |
| Fish intake, g/day                  | 37.71 (55.77)      | 32.96 (50.67)      | 22.18 (36.28)      | 47.52 (64.52)      |
| Carrot intake, g/day                | 26.43 (48.29)      | 33.73 (58.67)      | 29.48 (58.80)      | 20.49 (47.99)      |
| Tuber intake, g/day                 | 36.64 (63.52)      | 35.10 (56.16)      | 8.22 (30.23)       | 35.27 (54.78)      |
| Pastes intake, g/day                | 1.12 (4.68)        | 1.48 (5.54)        | 0.44 (2.57)        | 1.00 (3.62)        |

|                              |               |               |               |               |
|------------------------------|---------------|---------------|---------------|---------------|
| Other meat intake, g/day     | 8.38 (22.82)  | 5.42 (20.54)  | 3.98 (13.58)  | 14.09 (33.12) |
| Cake intake, g/day           | 9.65 (26.35)  | 13.30 (34.57) | 5.46 (19.01)  | 15.92 (36.38) |
| Sugar intake, g/day          | 2.35 (5.47)   | 2.32 (6.36)   | 1.53 (5.69)   | 3.25 (6.96)   |
| Vegetable oils intake, g/day | 37.38 (32.60) | 42.22 (35.59) | 38.37 (30.04) | 40.91 (41.60) |
| Animal oil intake, g/day     | 0.38 (3.04)   | 0.60 (3.74)   | 0.36 (2.31)   | 0.49 (4.34)   |
| Salt intake, g/day           | 9.14 (14.32)  | 10.03 (21.09) | 16.71 (83.58) | 8.05 (6.98)   |
| Sauce intake, g/day          | 9.40 (13.00)  | 10.01 (15.25) | 10.68 (13.39) | 9.65 (12.11)  |
| Other foods intake, g/day    | 17.94 (31.64) | 14.39 (24.96) | 9.65 (17.61)  | 17.19 (24.59) |

---
